# Supplementary material for: Pyrrovobasine, hybrid alkylated pyrraline monoterpene indole alkaloid pseudodimer discovered using a combination of mass spectral and NMR-based machine learning annotations
Source: Royal Society of Chemistry journal article supplement (doi:10.1039/d1ob01791h), 2021-09-27

# **Pyrovobasine, Hybrid Alkylated Pyrrolidine Monoterpene Indole Alkaloid Pseudodimer Discovered Using a Combination of Mass Spectral and NMR- Based Machine Learning Annotations**

Hugues Fouotsa,<sup>a, b, c</sup> Pierre Mkounga,<sup>c</sup> Alain Meli Lannang,<sup>d</sup> Jérôme Vanheuverzwijn,<sup>b</sup> Zhiyu Zhou,<sup>b</sup>  
Karine Leblanc,<sup>a</sup> Somia Rharrabti,<sup>a</sup> Augustin Ephrem Nkengfack,<sup>c</sup> Jean-François Gallard,<sup>e</sup> Véronique  
Fontaine,<sup>b</sup> Franck Meyer,<sup>b</sup> Erwan Poupon,<sup>a</sup> Pierre Le Pogam<sup>\*,a</sup> and Mehdi A. Beniddir<sup>\*,a</sup>

<sup>a</sup>Équipe "Chimie des Substances Naturelles" Université Paris-Saclay, CNRS, BioCIS, 5 rue J.-B. Clément, 92290 Châtenay-Malabry, France. E-mail: [pierre.le-pogam-alluard@universite-paris-saclay.fr](mailto:pierre.le-pogam-alluard@universite-paris-saclay.fr) ; [mehdi.beniddir@universite-paris-saclay.fr](mailto:mehdi.beniddir@universite-paris-saclay.fr)

<sup>b</sup>Faculty of Pharmacy, Microbiology, Bioorganic and Macromolecular Chemistry Unit, Université Libre de Bruxelles, Campus de la Plaine-CP 206/04, Boulevard du Triomphe, ACC.2, Po Box 1050 Belgium.

<sup>c</sup>Department of Organic Chemistry, Faculty of Science, University of Yaoundé I, P.O. Box 812, Yaoundé, Cameroon.

<sup>d</sup>Department of Chemistry, Higher Teachers Training College, University of Maroua, P.O. Box 55, Maroua, Cameroon.

Institut de Chimie des Substances Naturelles, CNRS, ICSN UPR 2301, Université Paris-Saclay, 91198 Gif-sur-Yvette, France.

[pierre.le-pogam-alluard@universite-paris-saclay.fr](mailto:pierre.le-pogam-alluard@universite-paris-saclay.fr)  
[mehdi.beniddir@universite-paris-saclay.fr](mailto:mehdi.beniddir@universite-paris-saclay.fr)

## Summary

|      |                                                                                 |    |
|------|---------------------------------------------------------------------------------|----|
| S1.  | Global molecular network                                                        | 3  |
| S2.  | Molecular family A                                                              | 5  |
| S3.  | Cartesian coordinates of 1                                                      | 5  |
| S4.  | HRESIMS spectrum of pyrrovobasine (1)                                           | 8  |
| S5.  | <sup>1</sup> H NMR spectrum (600 MHz, CDCl <sub>3</sub> ) of pyrrovobasine (1)  | 9  |
| S6.  | <sup>13</sup> C NMR spectrum (150 MHz, CDCl <sub>3</sub> ) of pyrrovobasine (1) | 10 |
| S7.  | COSY spectrum (600 MHz, CDCl <sub>3</sub> ) of pyrrovobasine (1)                | 11 |
| S8.  | HSQC spectrum (600 MHz, CDCl <sub>3</sub> ) of pyrrovobasine (1)                | 12 |
| S9.  | HMBC spectrum (600 MHz, CDCl <sub>3</sub> ) of pyrrovobasine (1)                | 13 |
| S10. | ROESY spectrum (600 MHz, CDCl <sub>3</sub> ) of pyrrovobasine (1)               | 14 |

## S1. Global molecular network

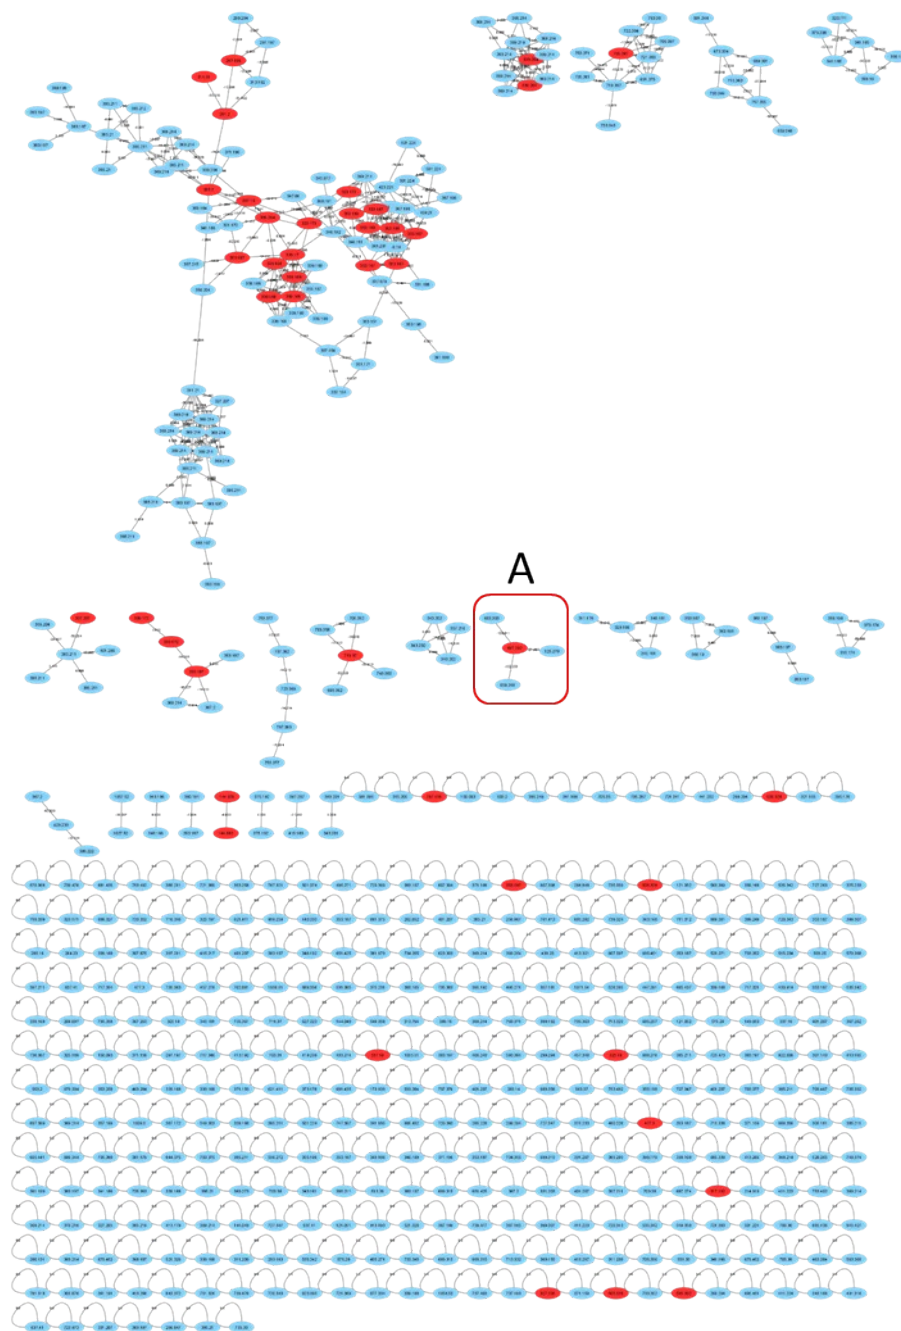

Figure S1: Molecular network of the stem bark alkaloid extract of *Voacanga africana*. Red nodes are dereplicated natural products against the GNPS library. A: cluster with targeted nodes for isolation. (this network is accessible at the following address: <https://gnps.ucsd.edu/ProteoSAFe/status.jsp?task=f050220a3dfb49389b1a176306c2eaa2>)

Table S1: Dereplicated MIA compounds from the GNPS library

| Compound                                   | Library | Matching score | Comment                                |
|--------------------------------------------|---------|----------------|----------------------------------------|
| akuammigine                                | GNPS    | 0.82           | not described in <i>Voacanga</i> genus |
| vobtusine                                  | MIADB   | 0.82           | described in <i>Voacanga</i> genus     |
| ibogamine                                  | MIADB   | 0.82           | not described in <i>Voacanga</i> genus |
| ajmalicine                                 | GNPS    | 0.81           | not described in <i>Voacanga</i> genus |
| tubotaiwine                                | MIADB   | 0.80           | not described in <i>Voacanga</i> genus |
| pericyclivine                              | MIADB   | 0.78           | not described in <i>Voacanga</i> genus |
| ibogaine                                   | MIADB   | 0.76           | described in <i>Voacanga</i> genus     |
| vobasine                                   | MIADB   | 0.75           | described in <i>Voacanga</i> genus     |
| perivine                                   | MIADB   | 0.75           | not described in <i>Voacanga</i> genus |
| pleiocarpamine                             | MIADB   | 0.71           | not described in <i>Voacanga</i> genus |
| ibogamine-18-carboxylic acid, methyl ester | GNPS    | 0.71           | not described in <i>Voacanga</i> genus |
| iboxygaine                                 | MIADB   | 0.71           | not described in <i>Voacanga</i> genus |
| tabersonine                                | MIADB   | 0.71           | described in <i>Voacanga</i> genus     |
| ceridimine                                 | MIADB   | 0.70           | not described in <i>Voacanga</i> genus |
| retuline                                   | MIADB   | 0.69           | not described in <i>Voacanga</i> genus |
| voacamine                                  | MIADB   | 0.66           | described in <i>Voacanga</i> genus     |
| alloyohimbine                              | MIADB   | 0.65           | not described in <i>Voacanga</i> genus |
| corynantheidal                             | MIADB   | 0.65           | not described in <i>Voacanga</i> genus |

(this table is accessible at the following address:

[https://gnps.ucsd.edu/ProteoSAFe/result.jsp?task=f050220a3dfb49389b1a176306c2eaa2&view=view\\_all\\_annotations\\_DB](https://gnps.ucsd.edu/ProteoSAFe/result.jsp?task=f050220a3dfb49389b1a176306c2eaa2&view=view_all_annotations_DB))

## S2. Molecular family A

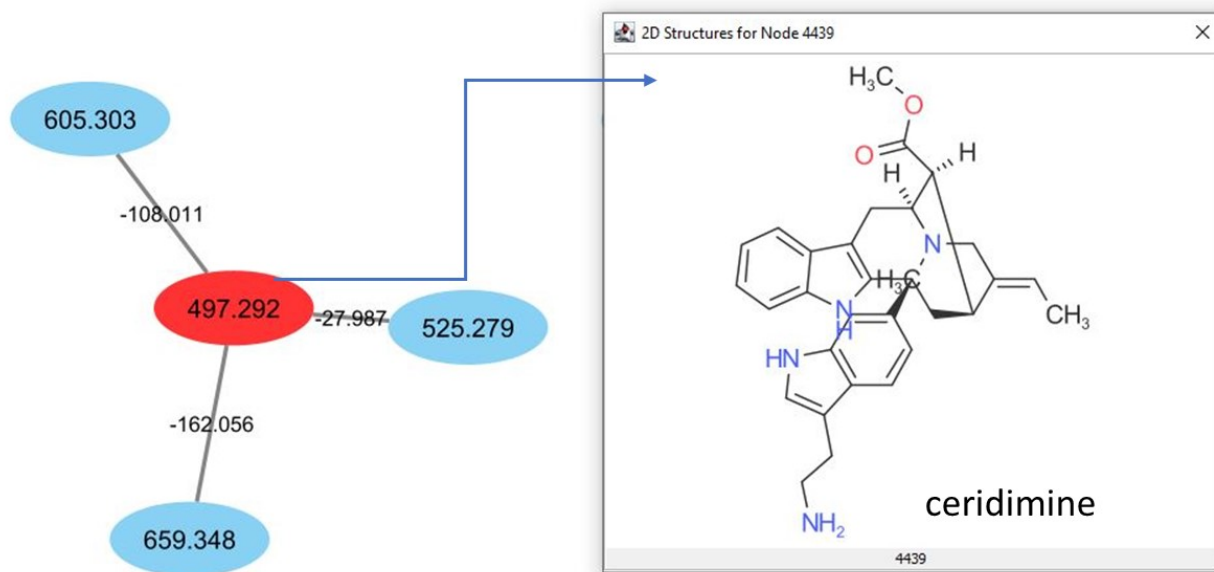

Figure S2: molecular family A (red node = ceridimine as it was annotated by GNPS,  $m/z$  605.303 was herein targeted for isolation and structure elucidation)

## S3. Cartesian coordinates of 1

Electronic energy (B3LYP): -1953.9174848122968 Ha.

Lowest frequency: 11.6382 cm<sup>-1</sup>.

Free enthalpy: -1953.275435 Ha.

Coordinates of the lowest energy conformer found at the B3LYP/6-31G\* level

1 C -4.823921 3.184522 -2.454515

2 C -3.753586 3.584850 -3.279894

3 C -2.452749 3.162931 -3.026361

4 C -2.249151 2.327662 -1.922815

5 N -1.099544 1.748387 -1.434151

6 C -3.309781 1.916864 -1.071639

7 C -4.613489 2.356940 -1.357758

8 C -2.740083 1.081727 -0.037408

9 C -3.533932 0.408775 1.051407

10 C -1.382387 1.001633 -0.296092

11 C -0.231664 0.283568 0.372519

12 C -0.639758 -0.665785 1.525665

13 C -1.393591 -1.981096 1.167067  
14 C -1.870530 -2.636269 2.455936  
15 C -1.267454 -3.673266 3.053615  
16 C -0.008853 -4.385033 2.640821  
17 C -3.112394 -2.006646 3.061500  
18 N -4.196803 -1.832354 2.085784  
19 C -5.410018 -1.325400 2.705745  
20 C -3.810198 -1.120975 0.855366  
21 C -2.640814 -1.921426 0.244987  
22 C -2.352987 -1.673903 -1.226464  
23 O -1.276262 -1.846812 -1.781624  
24 O -3.465791 -1.386270 -1.916065  
25 C -3.312809 -1.213840 -3.337334  
26 C 0.817272 1.274455 0.836386  
27 N 0.460189 2.513806 1.348754  
28 C 2.190796 1.143519 0.880942  
29 C 2.708207 2.378704 1.418991  
30 C 4.005173 2.855783 1.682179  
31 C 1.594701 3.216175 1.700843  
32 C 1.741005 4.500916 2.234275  
33 C 3.034234 4.944680 2.487843  
34 C 4.153282 4.131184 2.213461  
35 C 2.994140 -0.064582 0.484386  
36 C 3.426808 -0.042625 -0.994382  
37 N 4.165218 -1.251582 -1.378144  
38 C 5.527407 -1.460159 -1.190339  
39 C 6.459258 -0.523485 -0.606312  
40 O 6.210801 0.590154 -0.153516  
41 H 7.499739 -0.913889 -0.590811  
42 C 3.620969 -2.382288 -1.928956  
43 C 2.170520 -2.519409 -2.272120  
44 O 1.374151 -2.497919 -1.090870  
45 H 0.439785 -2.378998 -1.356542  
46 C 4.637086 -3.319042 -2.111679  
47 C 5.830117 -2.742501 -1.654404  
48 H -5.828439 3.531084 -2.681429  
49 H -3.947079 4.235262 -4.128472  
50 H -1.626552 3.471842 -3.661502  
51 H -0.163852 1.916992 -1.773117  
52 H -5.449369 2.056469 -0.730852  
53 H -4.504731 0.911071 1.127052  
54 H -3.057706 0.563333 2.023579

55 H 0.250154 -0.341109 -0.388381  
56 H 0.288117 -0.984550 2.011426  
57 H -1.177783 -0.096431 2.287642  
58 H -0.669857 -2.632857 0.672315  
59 H -1.726401 -4.058882 3.965997  
60 H -0.205718 -5.452207 2.469567  
61 H 0.740630 -4.333756 3.442197  
62 H 0.448431 -3.978708 1.734560  
63 H -3.492415 -2.647641 3.865096  
64 H -2.844733 -1.043302 3.545044  
65 H -6.200161 -1.243026 1.950709  
66 H -5.748249 -2.032451 3.472420  
67 H -5.295265 -0.338132 3.192065  
68 H -4.658575 -1.215599 0.170518  
69 H -3.023092 -2.955263 0.231566  
70 H -2.910098 -2.122805 -3.791021  
71 H -4.315249 -1.005493 -3.710249  
72 H -2.647515 -0.373335 -3.544965  
73 H -0.483983 2.870573 1.356689  
74 H 4.873739 2.244122 1.453163  
75 H 0.878338 5.128772 2.443052  
76 H 3.184375 5.937902 2.902720  
77 H 5.149680 4.513600 2.418167  
78 H 2.427020 -0.985156 0.650251  
79 H 3.898045 -0.119224 1.099953  
80 H 4.068029 0.817584 -1.185391  
81 H 2.548544 0.024525 -1.641434  
82 H 2.049659 -3.466205 -2.818859  
83 H 1.863452 -1.713246 -2.958520  
84 H 4.501120 -4.306599 -2.531853  
85 H 6.816394 -3.188239 -1.644206

#### S4. HRESIMS spectrum of pyrrovobasine (1)

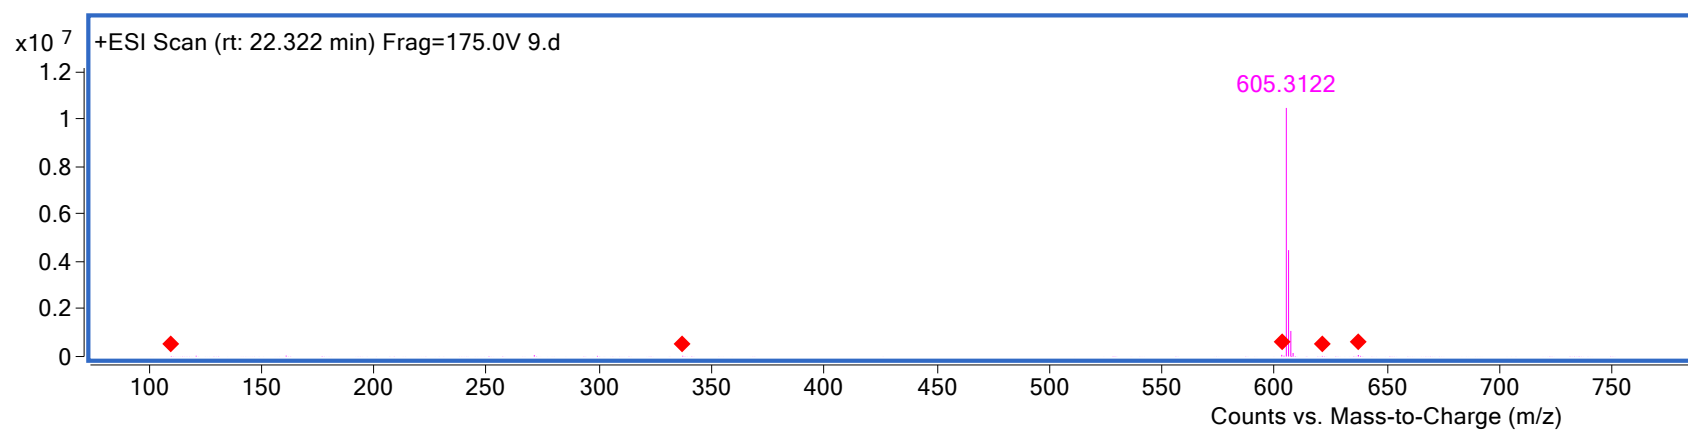



S5. <sup>1</sup>H NMR spectrum (600 MHz, CDCl<sub>3</sub>) of pyrrovobasine (1)

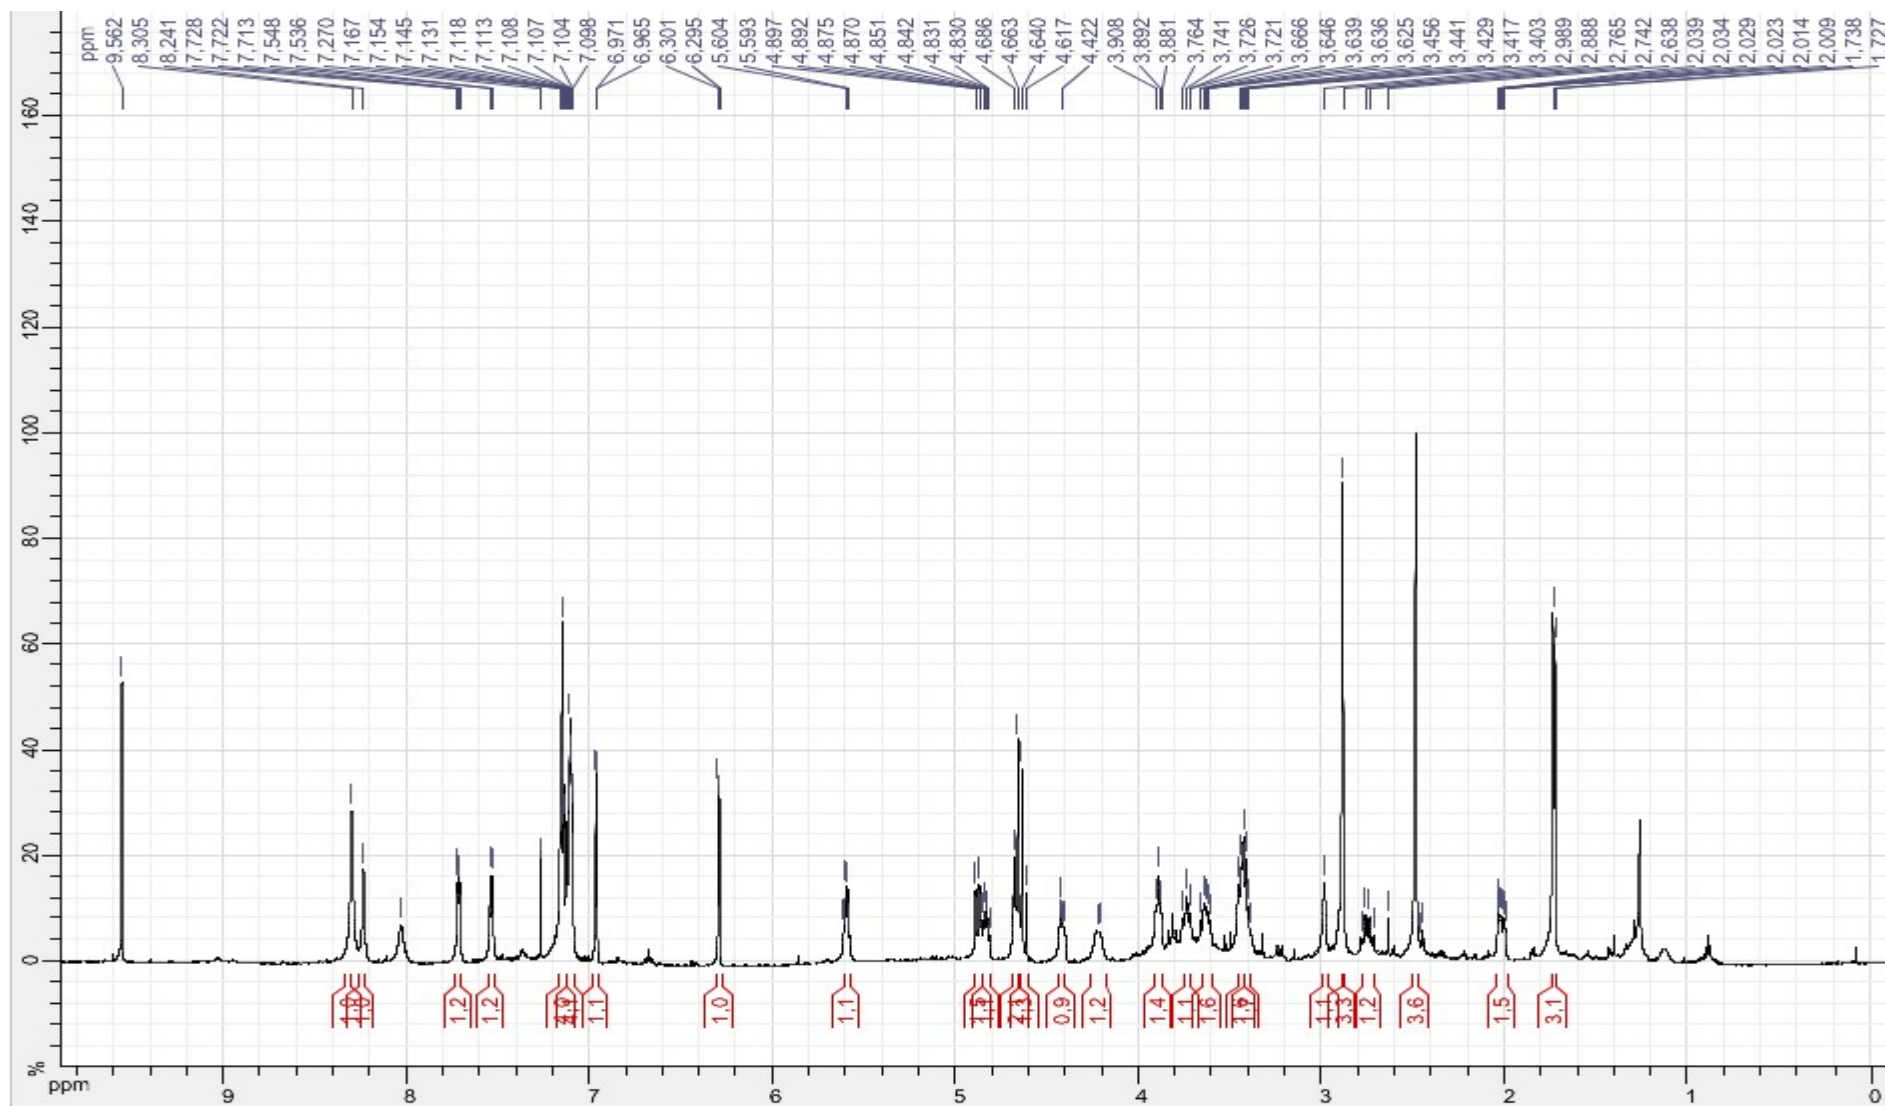

S6.  $^{13}\text{C}$  NMR spectrum (150 MHz,  $\text{CDCl}_3$ ) of pyrrovobasine (1)

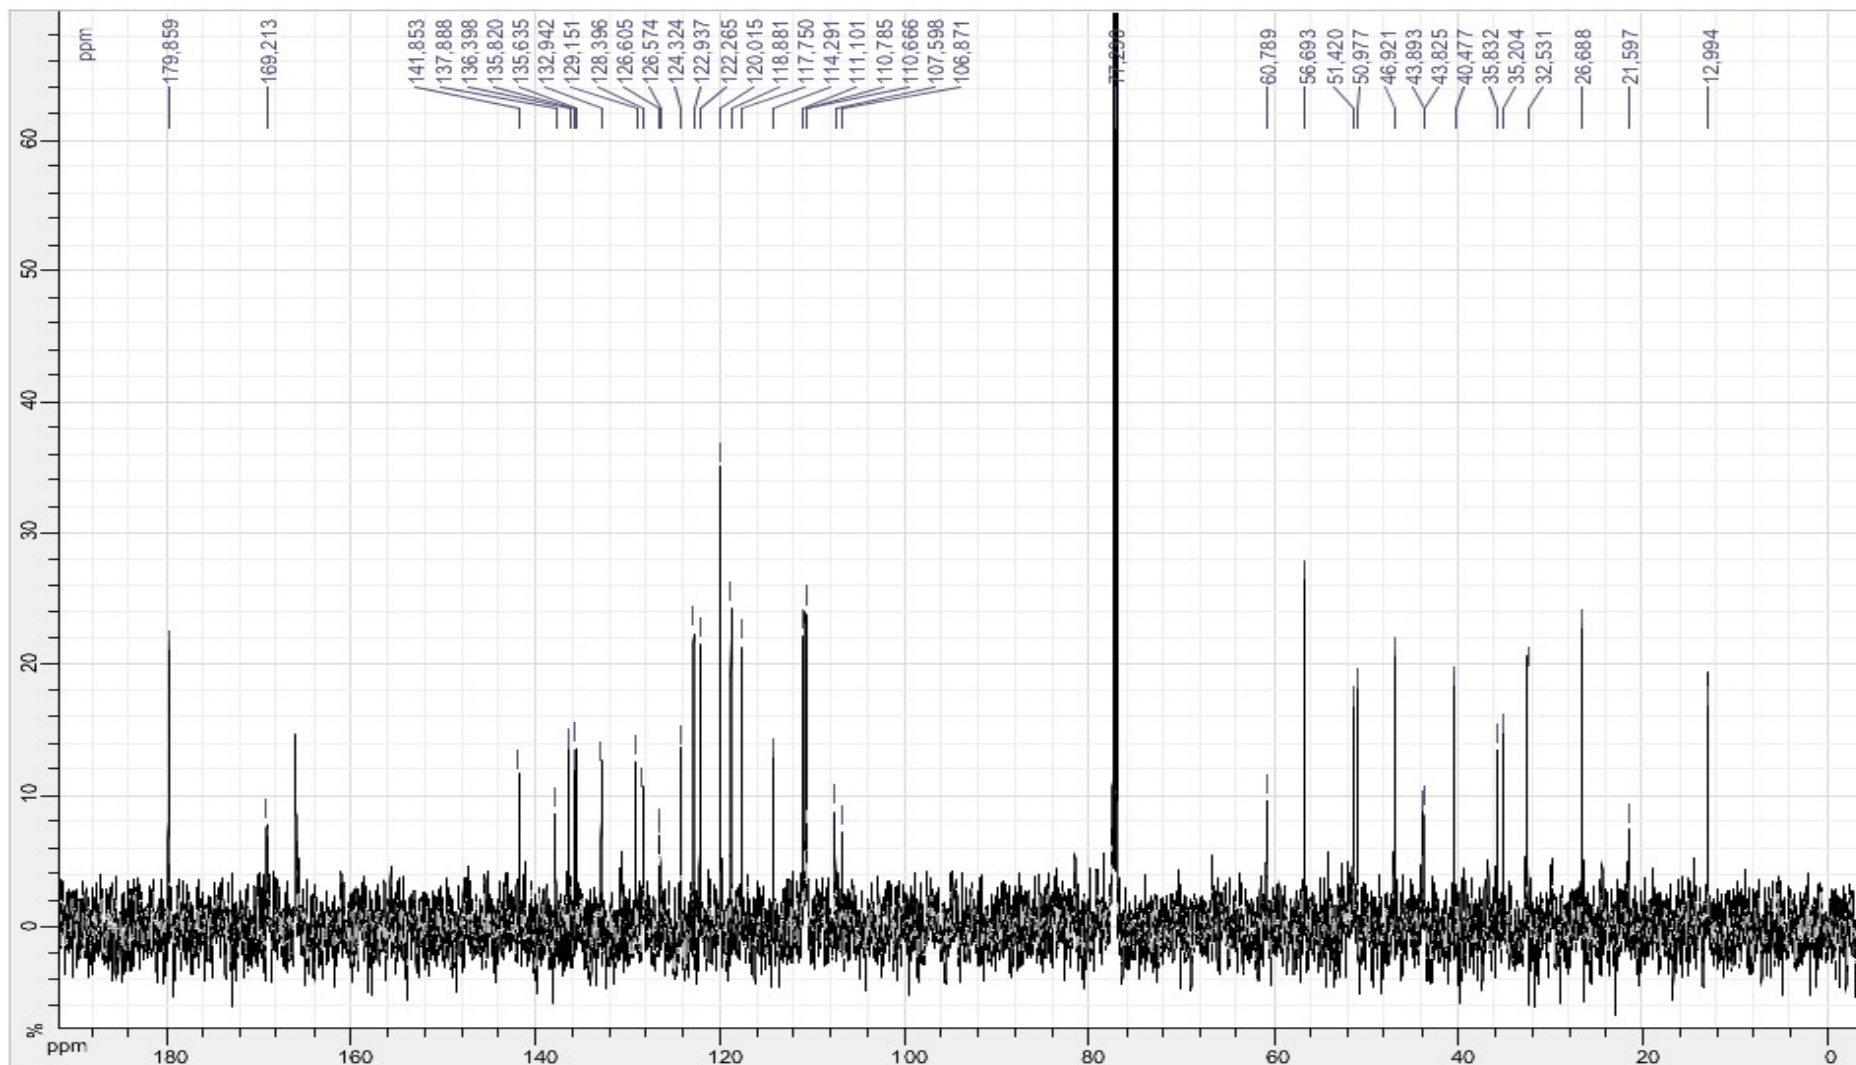

S7. COSY spectrum (600 MHz, CDCl<sub>3</sub>) of pyrrovobasine (1)

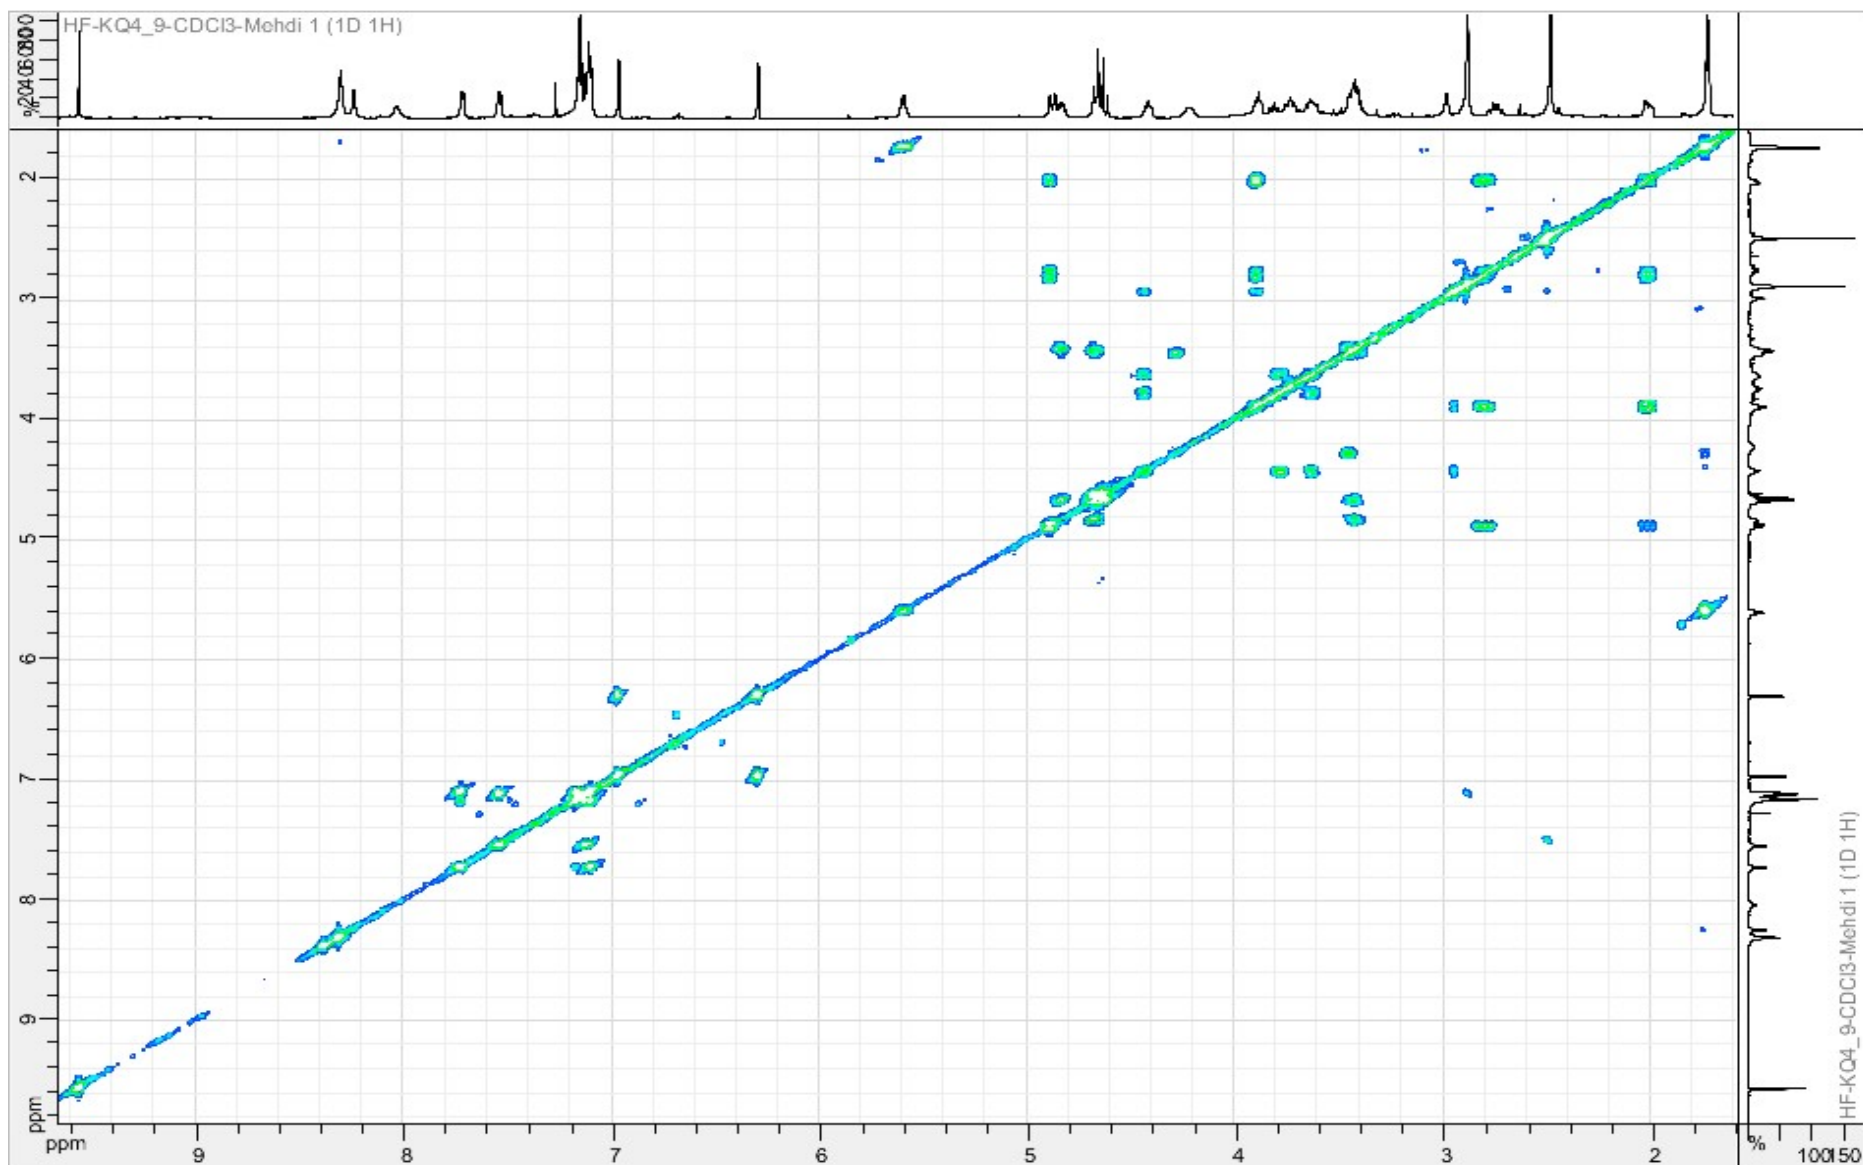

S8. HSQC spectrum (600 MHz, CDCl<sub>3</sub>) of pyrrovobasine (1)

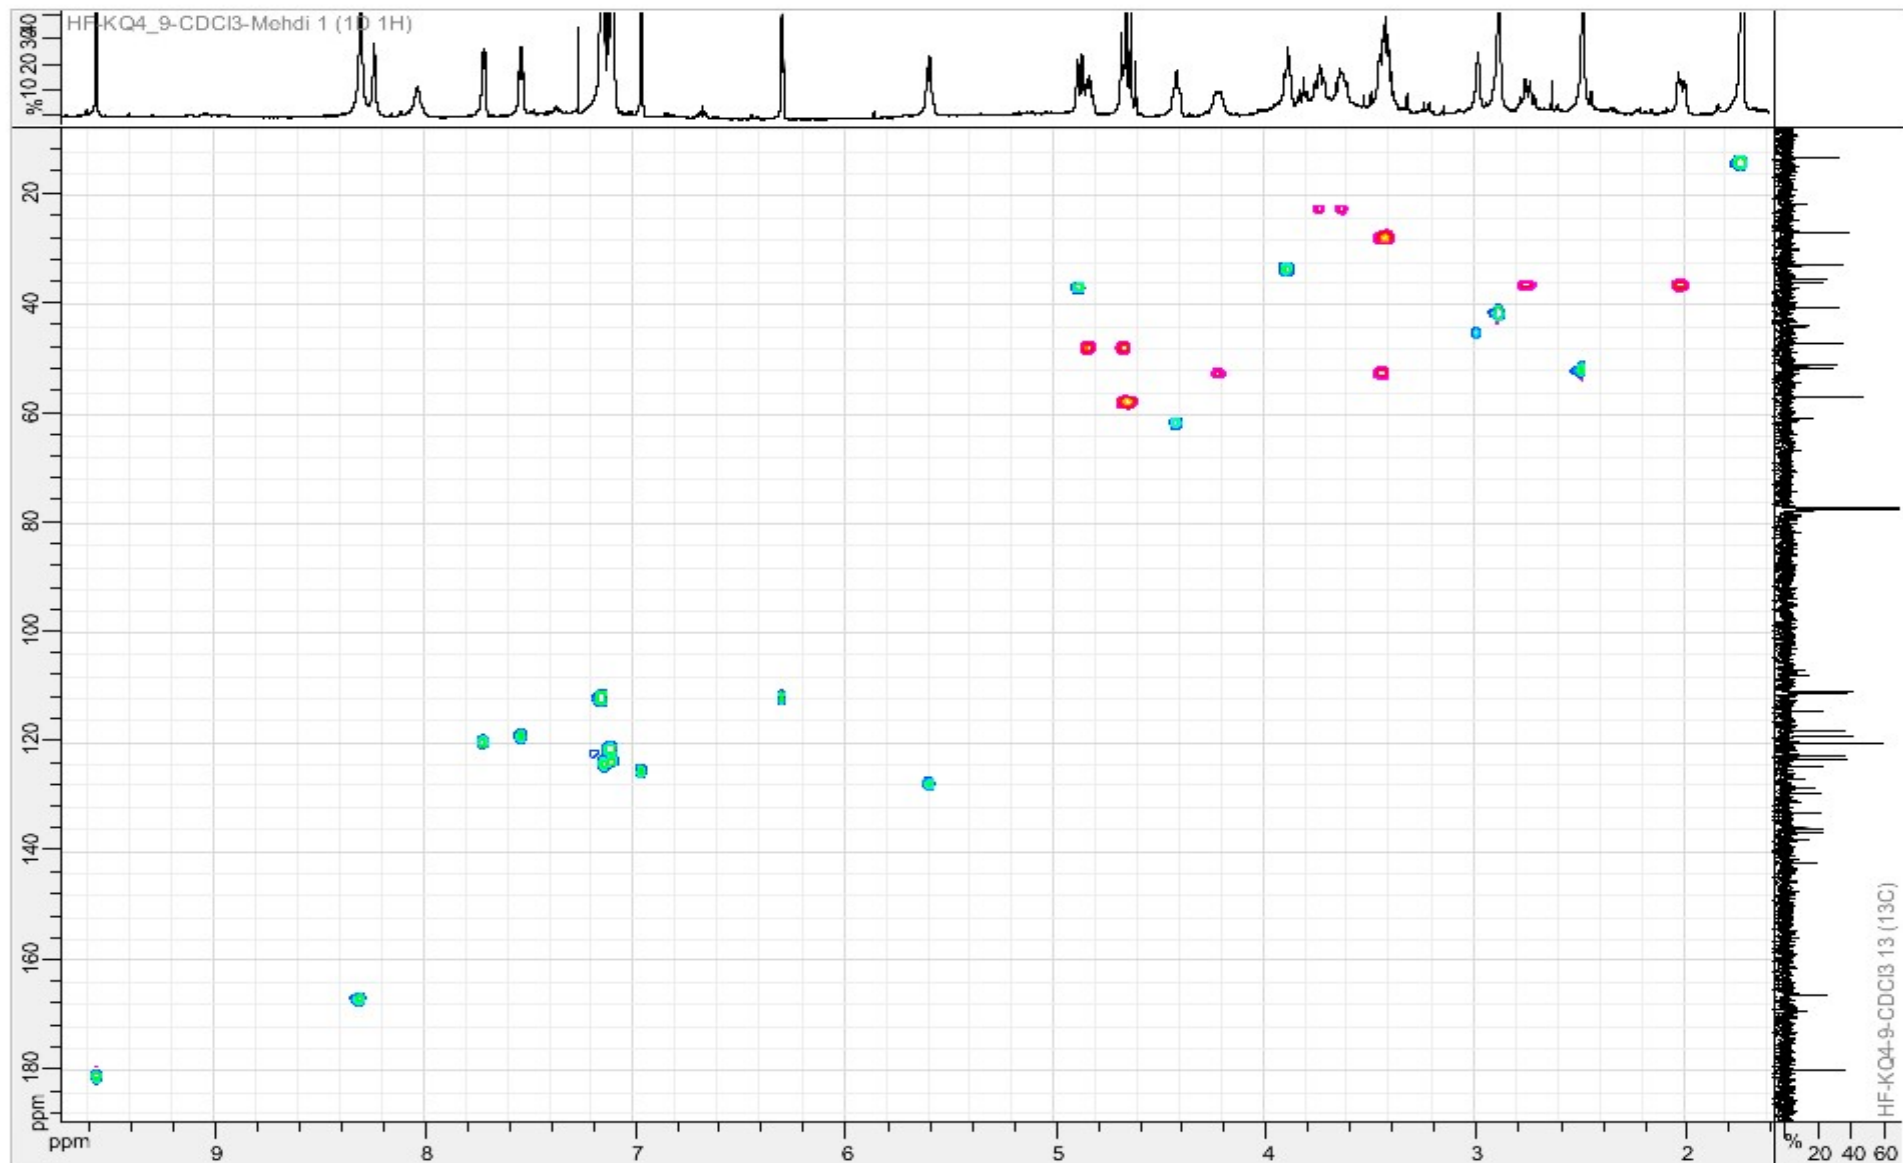

**S9. HMBC spectrum (600 MHz, CDCl<sub>3</sub>) of pyrrovobasine (1)**

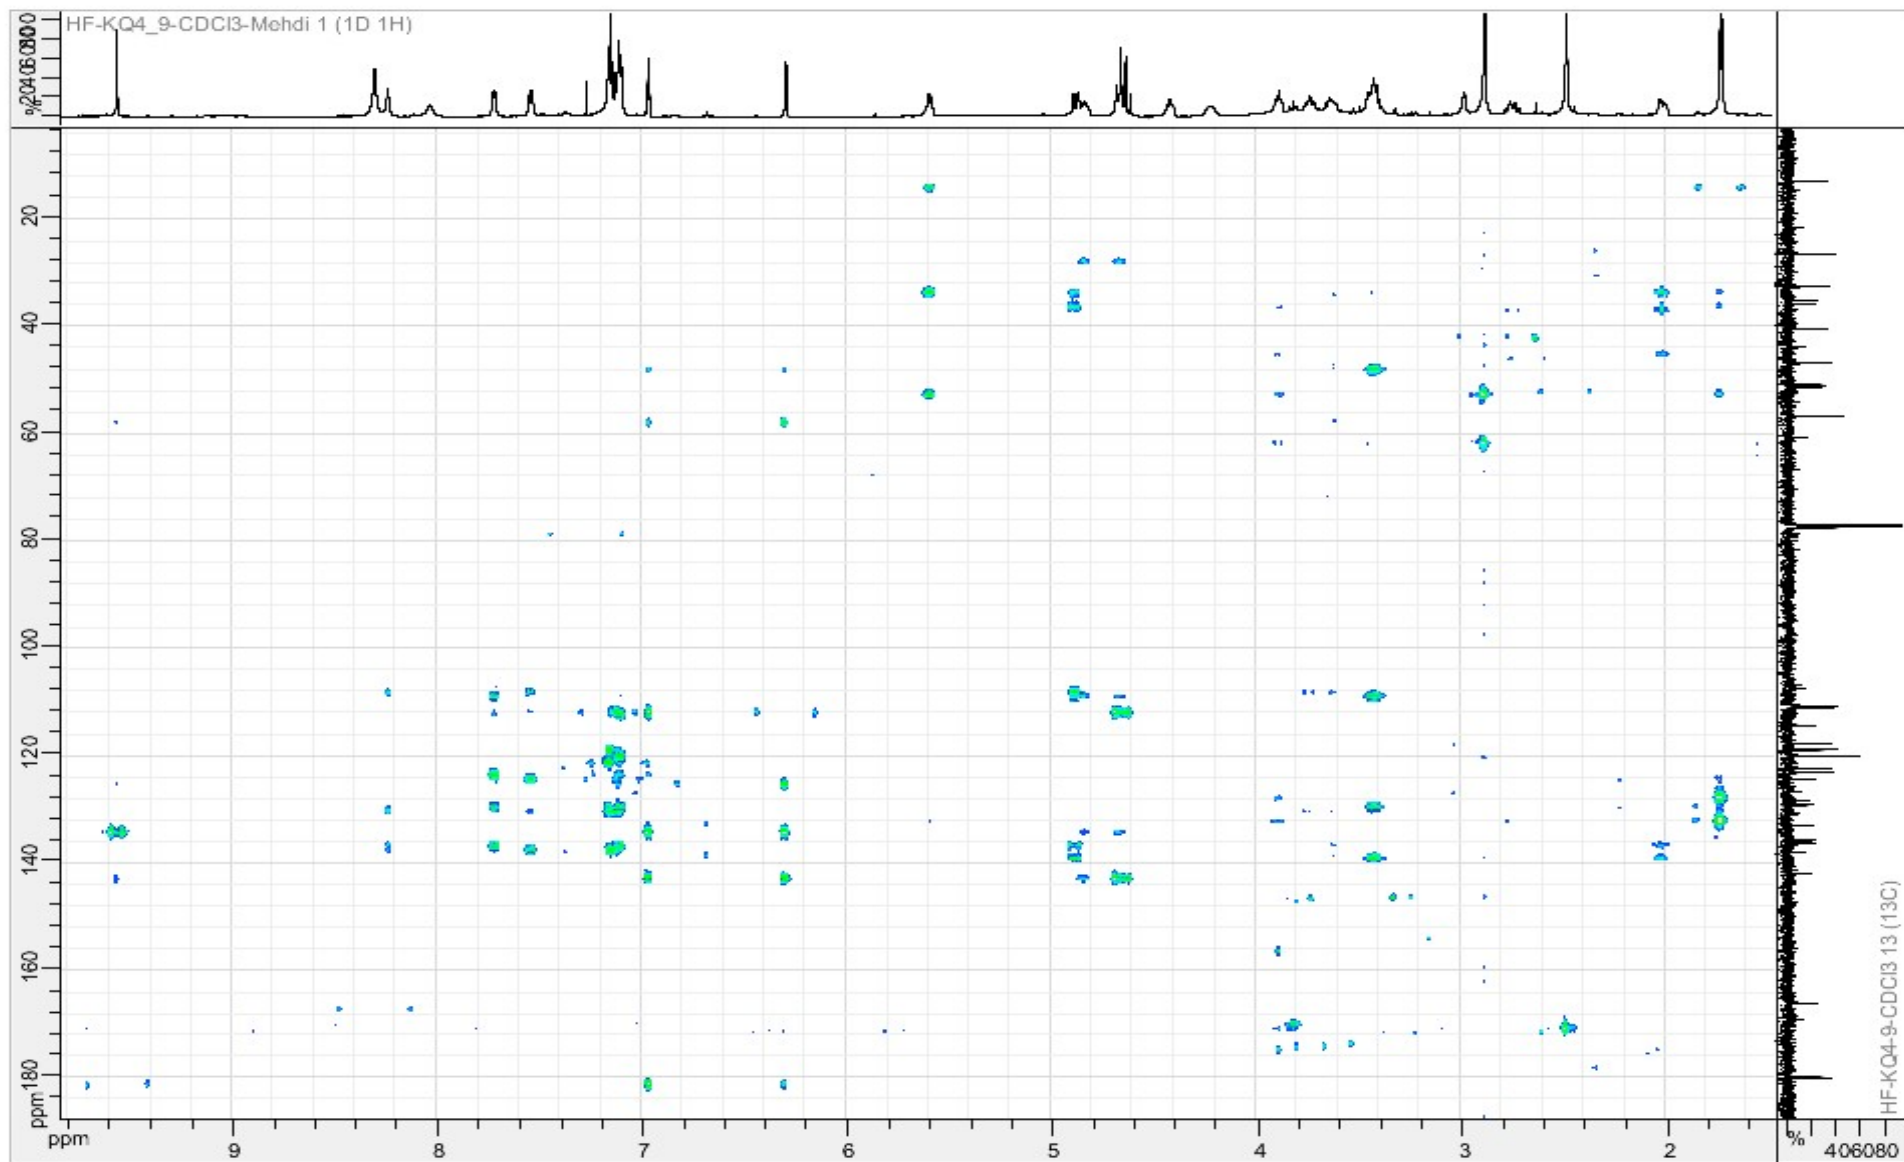

S10. ROESY spectrum (600 MHz, CDCl<sub>3</sub>) of pyrrovobasine (1)

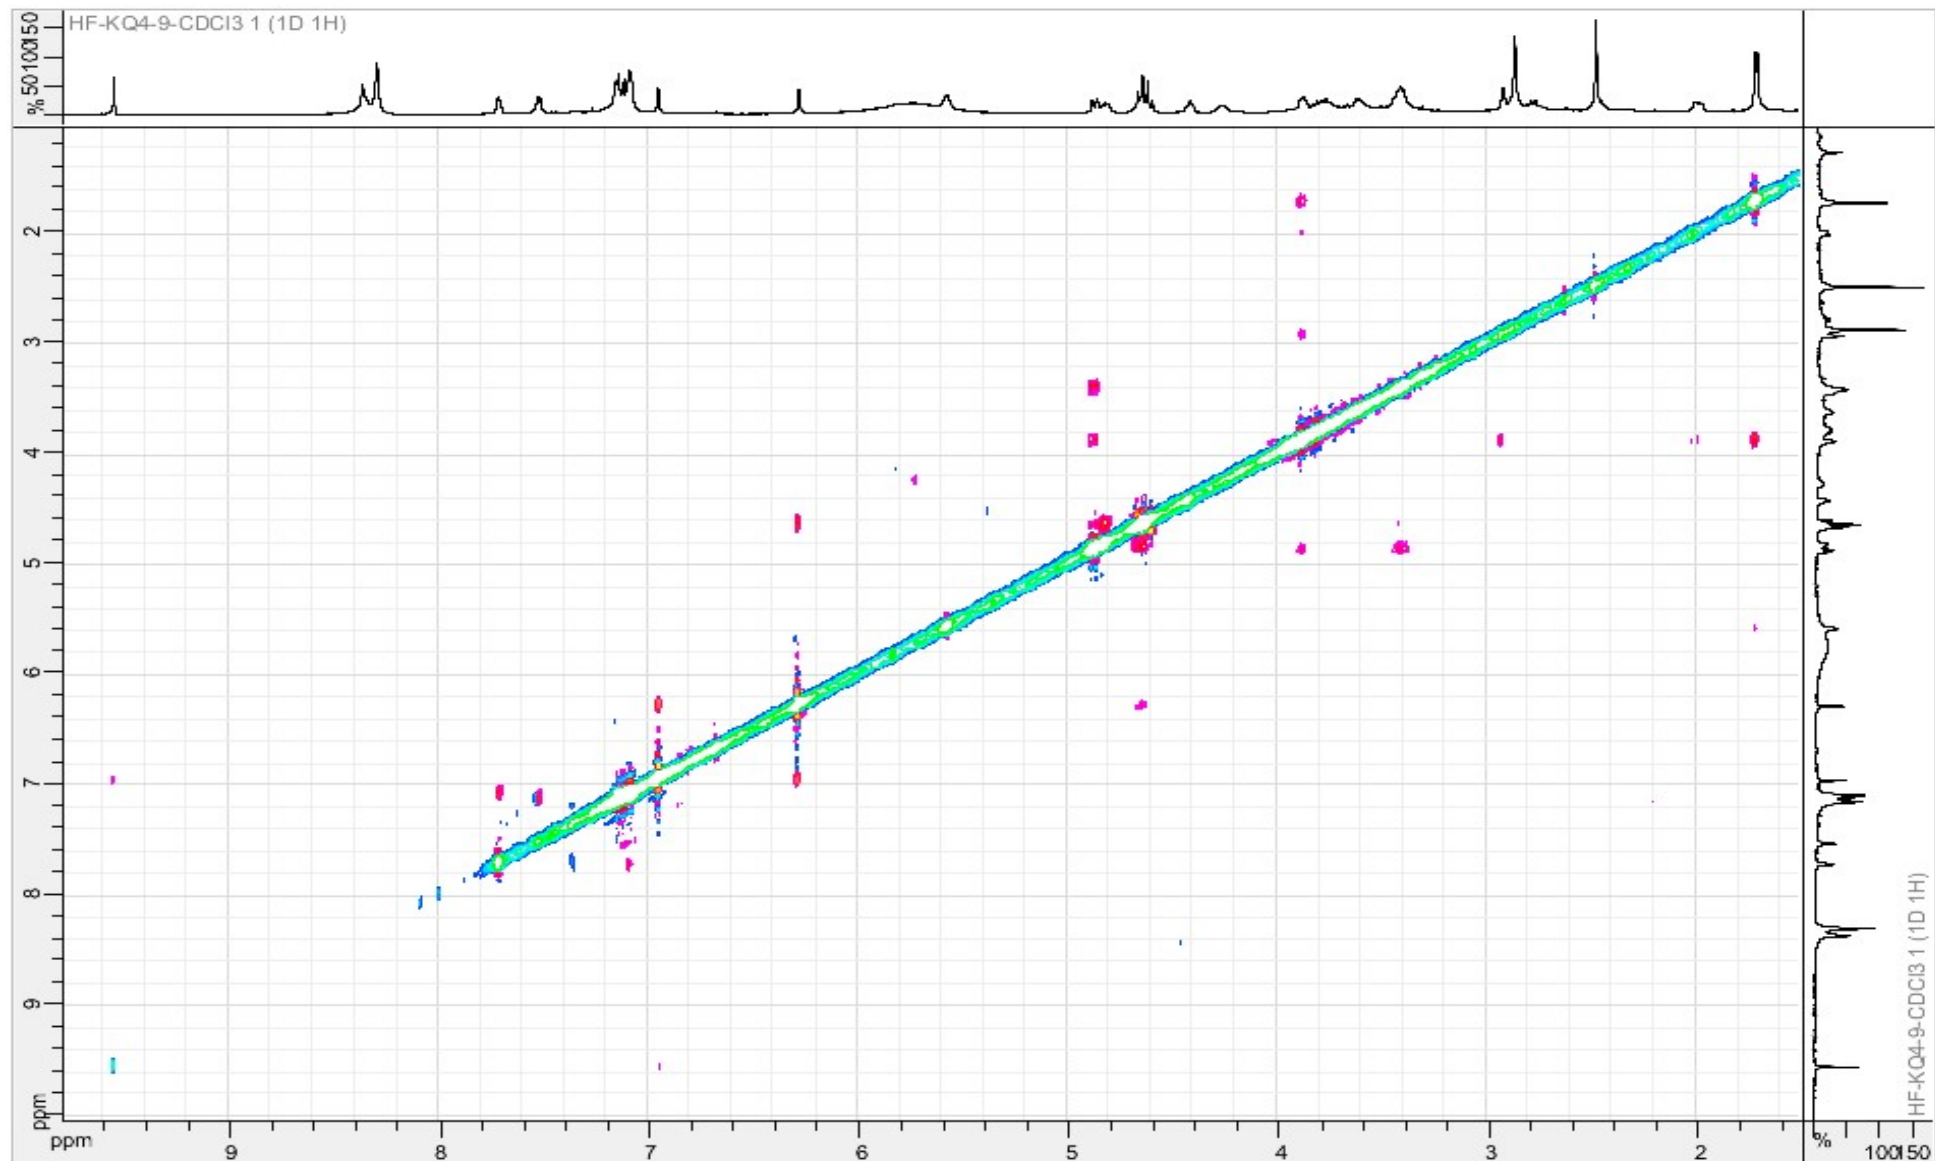

Supplement: d1ob01791h1.pdf [file d1ob01791h1.pdf]
